# Supplementary material for: Comparative Analysis of Plasmodium falciparum Genotyping via SNP Detection, Microsatellite Profiling, and Whole-Genome Sequencing
Source: PubMed Central journal article supplement (PMC8765236; doi:10.1128/aac.01163-21), 2022-01-18
Supplement: aac.01163-21-s0001.pdf [file aac.01163-21-s0001.pdf]

## SUPPLEMENTAL MATERIAL

Comparative Analysis of *Plasmodium falciparum* Genotyping via SNP Detection, Microsatellite Profiling, and Whole-Genome Sequencing

Mariko Kanai, Tomas Yeo, Victor Asua, Philip J. Rosenthal, David A. Fidock, and Sachel Mok

### Table of Contents

**FIG S1.** Sensitivity test of parasite culture PCR genotyping, in five drug resistance-conferring genes tested in nine mixtures containing different ratios of NF54 and Cam3.II blood stage cultures.

**FIG S2.** Validation of fragment analysis (FA)- and whole-genome sequencing (WGS)-based microsatellite (MS) genotyping for 12 strains.

**FIG S3.** Sensitivity test of gel electrophoresis- versus fragment analysis (FA)-based microsatellite (MS) genotyping for four markers using 11 mixtures with different ratios of HB3:Dd2 genomic DNA.

**FIG S4.** Whole-genome sequencing (WGS)-based microsatellite (MS) genotyping of 15 laboratory strains and sequencing metrics.

**TABLE S1.** PCR primers and reaction conditions for SNP genotyping by parasite culture PCR and Sanger sequencing.

**TABLE S2.** PCR primers and reaction conditions for gel electrophoresis and fragment analysis-based microsatellite (MS) genotyping.

**TABLE S3.** Sanger sequencing results of PCR using simulated fresh whole blood, frozen whole blood, and dried blood spot (DBS) gDNA.

**TABLE S4.** Single-nucleotide polymorphisms and microsatellite sizes of dried blood spots of Ugandan parasite samples and controls.

**TABLE S5.** KEL1/PLA1/PfPailin (KelPP) co-lineage status assayed in ten *P. falciparum* strains.

### SUPPLEMENTAL METHODS

Parasite culture PCR protocol for SNP genotyping.

Gel electrophoresis- and fragment analysis-based protocol for microsatellite genotyping.

*Plasmepsin 2* (*pm2*) copy number quantification by multiplexed TaqMan qPCR protocol.

### SUPPLEMENTAL REFERENCES

# Figure S1

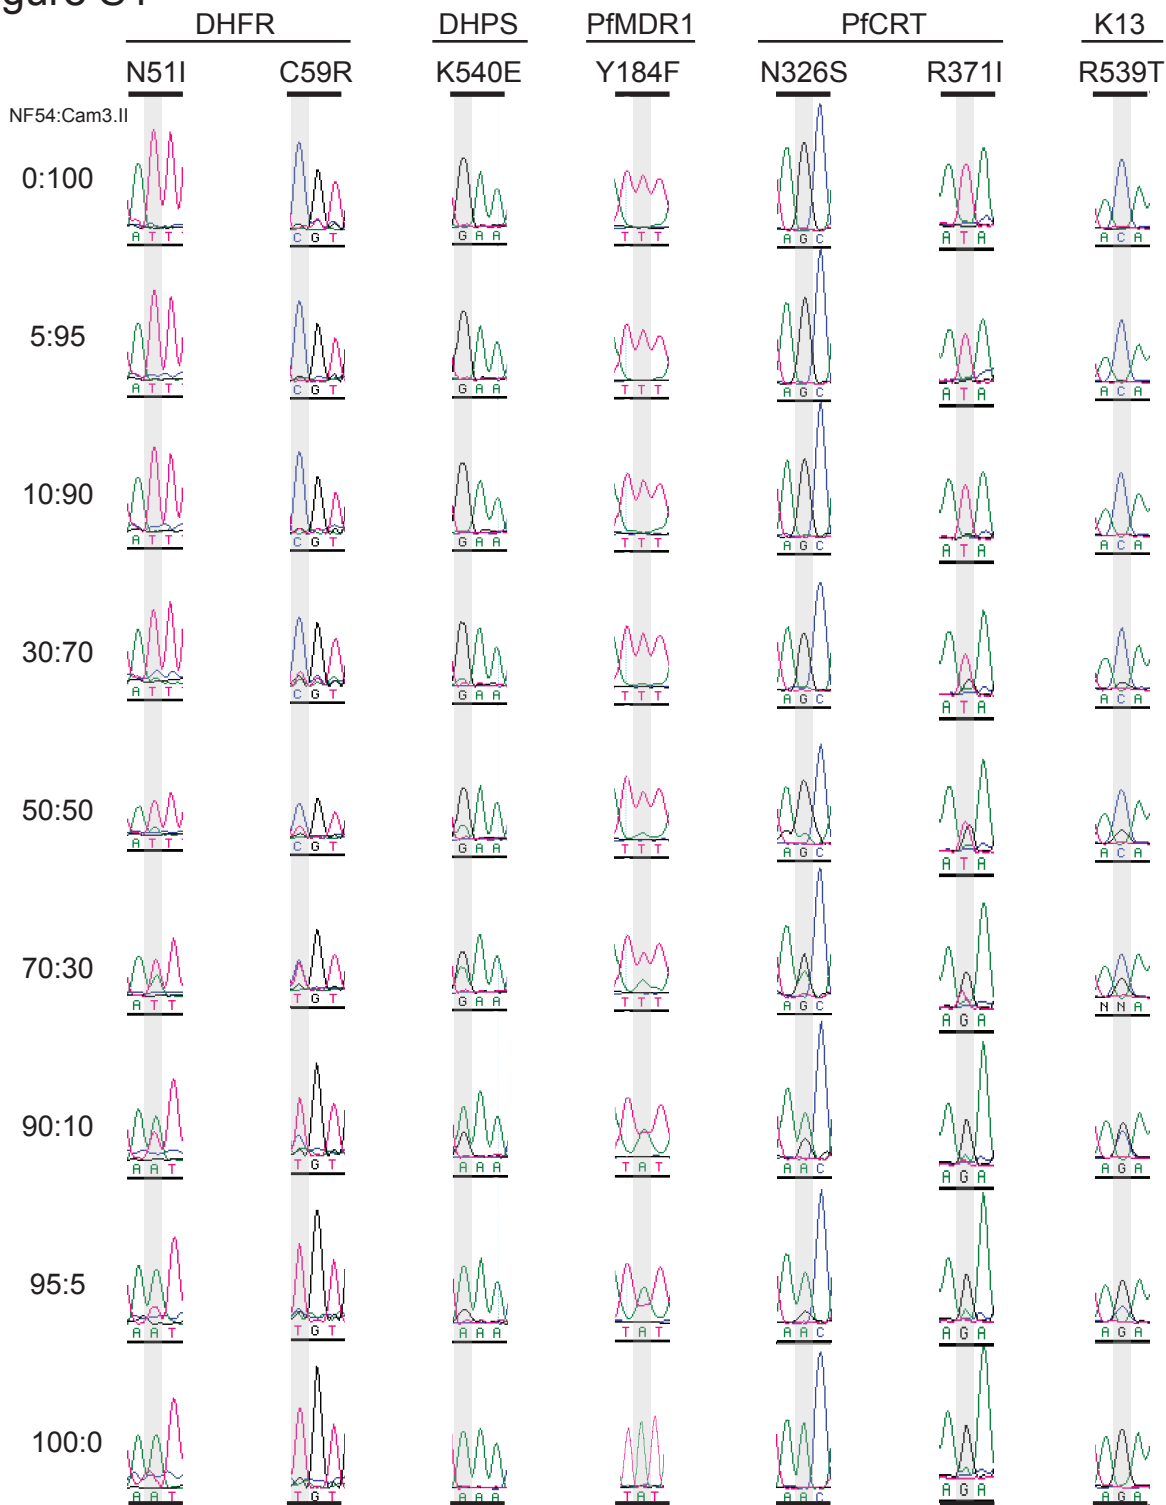

**FIG S1** Sensitivity test of parasite RBC culture PCR genotyping, in five drug resistance-conferring genes tested in nine mixtures containing different ratios of NF54 and Cam3.II blood stage cultures. Electropherograms showing the genotypes assessed for these mixtures in three independent occasions.

Figure S2

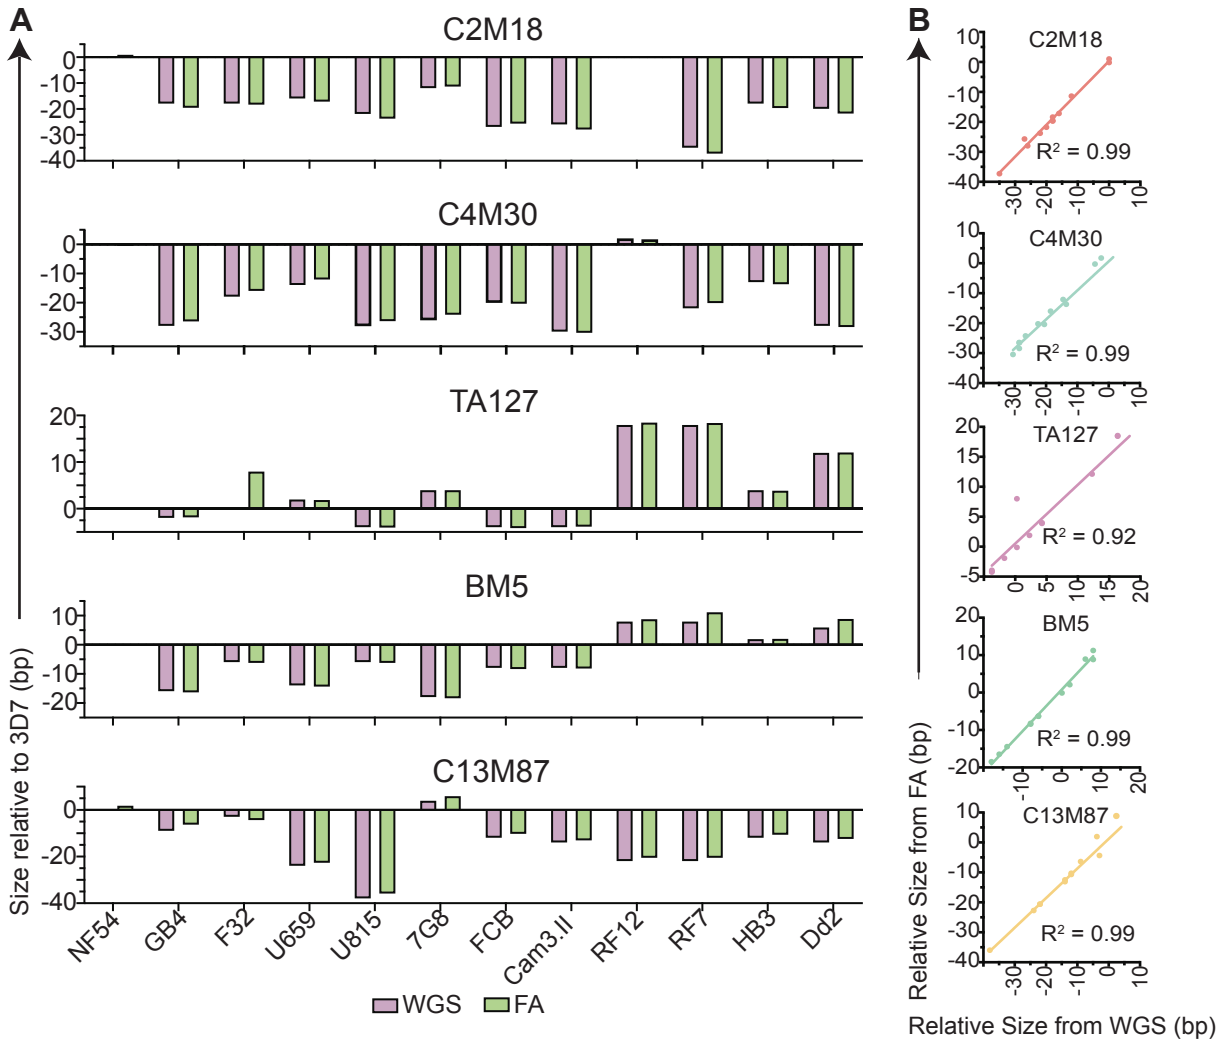

**FIG S2** Validation of fragment analysis (FA)- and whole-genome sequencing (WGS)-based microsatellite (MS) genotyping for 12 strains. (A) FA- versus WGS-derived MS size for each strain at the five selected markers relative to 3D7 (see Table 2). (B) Scatterplots showing high correlation ( $R^2$  values) between FA- and WGS-derived MS sizes.

# Figure S3

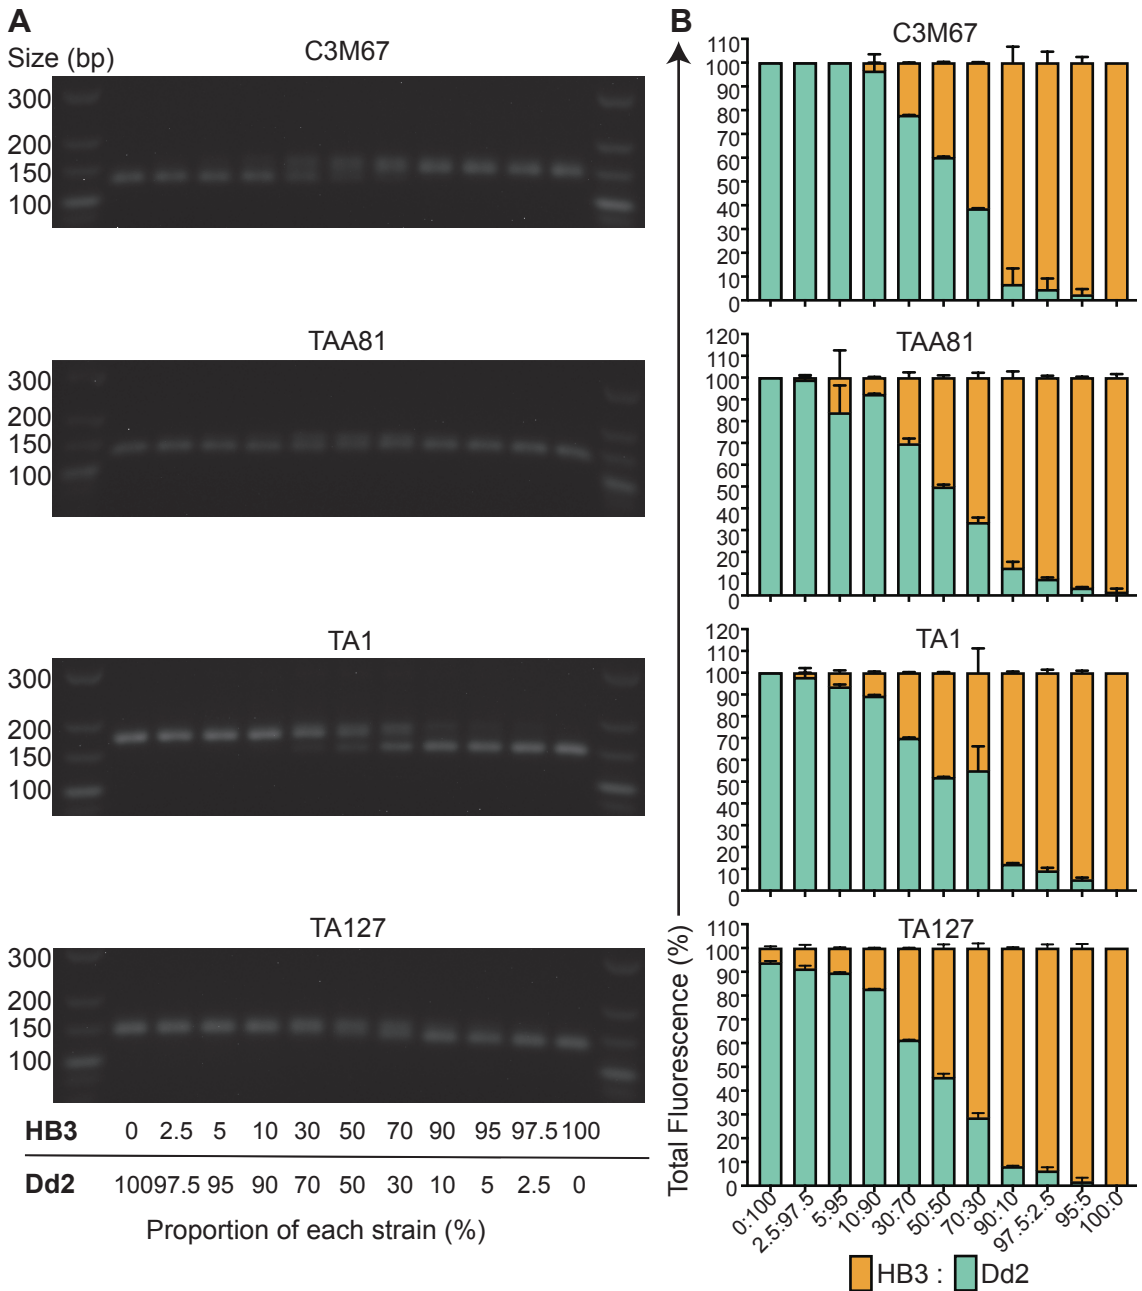

**FIG S3** Sensitivity test of gel electrophoresis- versus fragment analysis (FA)-based microsatellite (MS) genotyping for these four markers using 11 mixtures with different ratios of HB3:Dd2 genomic DNA. (A) Gel electrophoresis images of PCR products corresponding to HB3 or Dd2 MS sizes in each mixture. (B) Bar charts represent the average proportion of HB3 or Dd2 fragment sizes in each mixture determined from FA in two independent experiments. Error bars represent SEM values.

# Figure S4

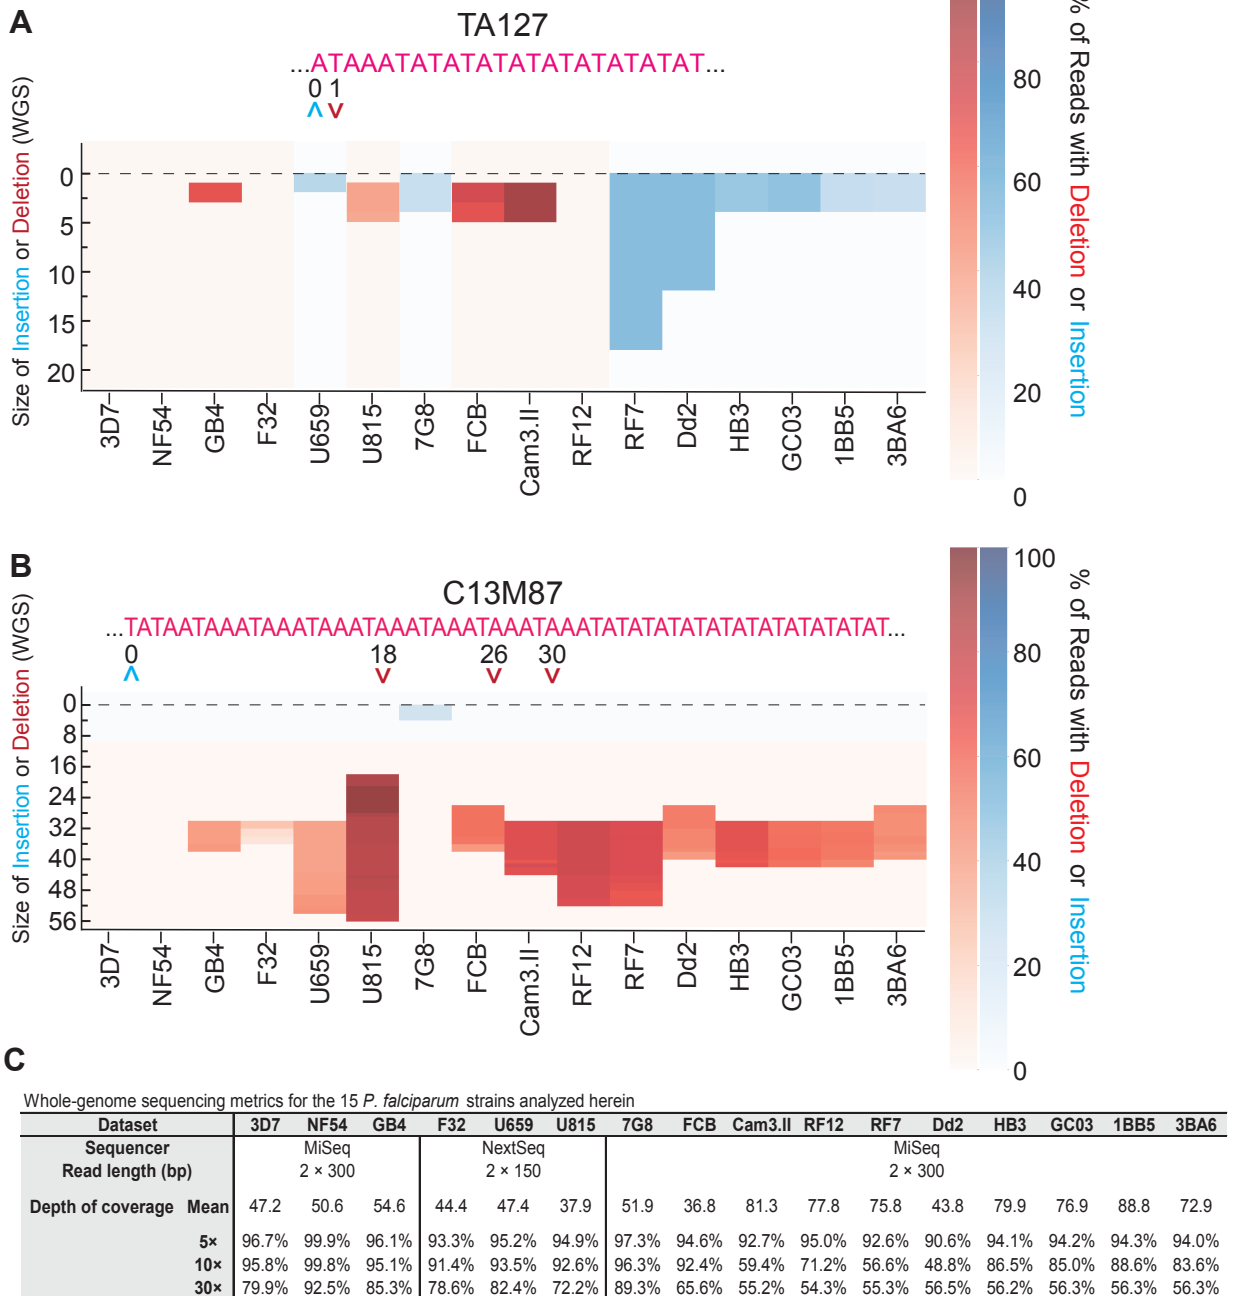

**FIG S4** Whole-genome sequencing (WGS)-based microsatellite (MS) genotyping of 15 laboratory strains and sequencing metrics. Heatmaps are shown for two MS markers, (A) TA127 and (B) C13M87, indicating the % of reads harboring an insertion (blue) or deletion (red) sequence for each strain relative to 3D7. The MS sequence for 3D7 (pink) and the position at which the insertion or deletion occurred within the MS fragment window are shown. (C) WGS metrics for the *P. falciparum* strains analyzed in this study.

**TABLE S1** PCR primers and reaction conditions for SNP genotyping by parasite culture PCR and Sanger sequencing

| Drug Resistance-Associated Gene <sup>a</sup>        | Exon                    | Drug Resistance-Associated Change                 |                                                                     | Sanger Sequencing Primer                                       |                          | Forward Primer                                         |                          | Reverse Primer                                       |                          | PCR Product Size (kb) | 35 cycles <sup>b</sup> |            |           |            |           |            |      |  |
|-----------------------------------------------------|-------------------------|---------------------------------------------------|---------------------------------------------------------------------|----------------------------------------------------------------|--------------------------|--------------------------------------------------------|--------------------------|------------------------------------------------------|--------------------------|-----------------------|------------------------|------------|-----------|------------|-----------|------------|------|--|
|                                                     |                         | Amino Acid                                        | Nucleotide                                                          | Sequence (5'→3')                                               | Lab Primer ID            | Sequence (5'→3')                                       | Lab Primer ID            | Sequence (5'→3')                                     | Lab Primer ID            |                       | Denaturation           |            | Annealing |            | Extension |            |      |  |
|                                                     |                         |                                                   |                                                                     |                                                                |                          |                                                        |                          |                                                      |                          |                       | Temp (°C)              | Time (min) | Temp (°C) | Time (min) | Temp (°C) | Time (min) |      |  |
| dihydrofolate reductase ( <i>dhfr</i> )             | 1                       | N511<br>C59R<br>S108N/T<br>I164L                  | aAt/aTt<br>Tgt/Cgt<br>aGc/aAc/aCc<br>Ata/Tta                        | ACAAGTCTGCGAC<br>GTTTTCGATATTTAT<br>G                          | p7818                    | ACAAGTCTGCGA<br>CGTTTTCGATATT<br>TATG                  | p7818                    | AGTATATACATCG<br>CTAACAGA                            | p7819                    | 0.64                  | 95                     | 0:30       | 52        | 1:00       | 62        | 1:00       |      |  |
| dihydropteroate synthase ( <i>dhps</i> )            | 2                       | S436A/F/C<br>A437G<br>K540E/N<br>A581G<br>A613S/T | Tct/Gct/tTt/tGt<br>gCt/gGt<br>AaA/Gaa/aaT<br>gCg/gGg<br>Gcc/Tcc/Acc | ATGCTTAAATGATAT<br>GATACCCG<br>CATGTAATTCATCT<br>GAAACATCC     | p7924<br>p7872           | ATGCTTAAATGAT<br>ATGATACCCG                            | p7924                    | CATGTAATTCATC<br>TGAAACATCC                          | p7872                    | 0.97                  | 95                     | 0:30       | 52        | 1:00       | 62        | 1:00       |      |  |
| multidrug resistance protein 1 ( <i>pfmdr1</i> )    | 1                       | N86Y<br>Y184F<br>G293D                            | Aat/Tat<br>tAt/tTt<br>gGt/gAt                                       | TTATTTGATTTTGTG<br>TTGAAAGATGG<br>CATAAACATACTAA<br>TAAGTACACC | p792<br>p7920            | TTATTTGATTTTGTG<br>TGTGAAAGATG<br>G                    | p792                     | TTTGGTAATGTTTC<br>TCCATCATCA                         | p286                     | 1.14                  | 95                     | 0:30       | 54        | 0:30       | 62        | 2:30       |      |  |
|                                                     |                         | N86Y<br>Y184F                                     | Aat/Tat<br>tAt/tTt                                                  | TGTATGTGCTGTATT<br>ATCAGGA                                     | p7820 <sup>c</sup>       | TGTATGTGCTGTA<br>TTATCAGGA                             | p7820                    | CTCTTCTATAATG<br>GACATGGTA                           | p7821                    | 0.60                  | 95                     | 0:30       | 52        | 0:40       | 62        | 1:00       |      |  |
|                                                     |                         | S1034C<br>N1042D                                  | AgT/Tgt<br>Aat/Gat                                                  | TCATTTCATAATGCT<br>CTTCTCTGG                                   | p7923                    | TCATTTCATAATG<br>CTCTTCTCTGG                           | p7923                    | GCAGCAAACCTTAC<br>TAACACG                            | p7823                    | 1.13                  | 95                     | 0:30       | 52        | 1:00       | 62        | 1:00       |      |  |
|                                                     |                         | D1246Y                                            | Gat/Tat                                                             | GCAGCAAACCTTACT<br>AACACG                                      | p7823                    |                                                        |                          |                                                      |                          |                       |                        |            |           |            |           |            |      |  |
|                                                     |                         |                                                   |                                                                     |                                                                |                          |                                                        |                          |                                                      |                          |                       |                        |            |           |            |           |            |      |  |
|                                                     |                         |                                                   |                                                                     |                                                                |                          |                                                        |                          |                                                      |                          |                       |                        |            |           |            |           |            |      |  |
| chloroquine resistance transporter ( <i>pfprt</i> ) | 2                       | C72S<br>M74I<br>N75E<br>K76T<br>T93S<br>H97L/Y    | Tgt/AgT<br>atG/atT<br>AaT/GaA<br>aAa/aCa<br>Aca/Tca<br>CAc/cTc/Tac  | CCCTTGTCGACCTT<br>AACAGATGGCTC                                 | p3519                    | ATGAAATTCGCA<br>AGTAAAAAAAATA<br>ATCAAAAAAATTC<br>AAGC | p7011                    | CCAATCATTTGTT<br>CTTCAATTAAGTA<br>TTCTTAATTAATG<br>T | p8402                    | 0.86                  | 95                     | 0:30       | 52        | 0:30       | 62        | 1:00       |      |  |
|                                                     |                         | F145I                                             | Ttc/Atc                                                             | GAACGACACCGAA<br>GCTTTA                                        | p7947                    |                                                        |                          |                                                      |                          |                       |                        |            |           |            |           |            |      |  |
|                                                     | 4                       | I218F<br>A220S                                    | Att/Ttt<br>Gcc/Tcc                                                  | ATTTACTCCTTTTTA<br>GATATCACTTA                                 | p7868                    | ATTTACTCCTTTT<br>TAGATCACTTA                           | p7868                    | TTATATTTTTTAAA<br>AACTATTTCCCTT<br>G                 | p7869                    | 0.35                  | 95                     | 0:30       | 48        | 0:30       | 62        | 0:30       |      |  |
|                                                     |                         | Q271E                                             | Caa/Gaa                                                             | ATTTCTTATAGGCTA<br>TGGTATCC                                    | p3805                    | ATTTCTTATAGGC<br>TATGGTATCC                            | p3805                    | CCAAGAATAAACA<br>TGCGAAACC                           | p3806                    | 0.25                  | 95                     | 0:30       | 50        | 0:30       | 62        | 0:45       |      |  |
|                                                     | 9                       | N326S/D                                           | AAc/aGc/Gac                                                         | CCCATATTTATTTT<br>CTCTTGATG                                    | p7719                    |                                                        |                          |                                                      |                          |                       |                        |            |           |            |           |            |      |  |
|                                                     | 10                      | M343L<br>C350R<br>G353V<br>I356T/L                | Atg/Ttg<br>Tgt/Cgt<br>gGt/gTt<br>ATa/aCa/Tta                        | ATTCTTAGGCTAAG<br>AATTTAAAG<br>ATGTAACCATATAA<br>TTTTTC        | p7989<br>p7956           | TATGTGATGATTG<br>TGACGGAGC                             | p7950                    | TTATAGAACCAAA<br>TAGGTAGCC                           | p7949                    | 0.87                  | 95                     | 0:30       | 55        | 0:30       | 62        | 0:45       |      |  |
|                                                     |                         | R371I                                             | aGa/aTa                                                             | AAATGTTTATGATG<br>GTACAACG                                     | p7979                    |                                                        |                          |                                                      |                          |                       |                        |            |           |            |           |            |      |  |
|                                                     |                         |                                                   |                                                                     |                                                                |                          |                                                        |                          |                                                      |                          |                       |                        |            |           |            |           |            |      |  |
|                                                     | kelch-13 ( <i>k13</i> ) | 1                                                 | R539T<br>C580Y                                                      | aGa/aCa<br>tGt/At                                              | CGGAGTGACCAAAT<br>CTGGGA | p6175                                                  | GGGAATCTGGTG<br>GTAACAGC | p6176                                                | CGGAGTGACCAA<br>ATCTGGGA | p6175                 | 2.10                   | 95         | 0:30      | 58         | 0:30      | 62         | 1:45 |  |

<sup>a</sup>Gene IDs are *dhfr* (PF3D7\_0417200), *dhps* (PF3D7\_0810800), *pfmdr1* (PF3D7\_0523000), *pfprt* (PF3D7\_0709000), and *k13* (PF3D7\_1343700).

<sup>b</sup>For all PCR reactions, the initial denaturation step is 95°C for 3 min, and final extension is at 62°C for 3 min for all conditions.

<sup>c</sup>p7820 and p7821 work better than p792 and p286 for sequencing *pfmdr1* in clinical isolates and whole blood.

**TABLE S2** PCR primers and reaction conditions for gel electrophoresis and fragment analysis-based microsatellite (MS) genotyping

| MS Marker           | Chr. | Location (Kb) | Distinct from 3D7                                            | Multiplex Group <sup>b</sup> | Forward Primer            |                 | Reverse Primer                |                           | 30 cycles <sup>c</sup> |           |           |           |            |           | MS Repeat Sequence (5'→3'; 3D7; Variable Region Bolded) including Fwd/Rev Primers <sup>d</sup> | Description of MS Marker Location                                                                                                                                                                                                                                                                     |                                                                                                                                                  |           |            |
|---------------------|------|---------------|--------------------------------------------------------------|------------------------------|---------------------------|-----------------|-------------------------------|---------------------------|------------------------|-----------|-----------|-----------|------------|-----------|------------------------------------------------------------------------------------------------|-------------------------------------------------------------------------------------------------------------------------------------------------------------------------------------------------------------------------------------------------------------------------------------------------------|--------------------------------------------------------------------------------------------------------------------------------------------------|-----------|------------|
|                     |      |               |                                                              |                              | Unlabeled Primer          | 5' Modification | Unlabeled Primer              | Lab Primer                | Denaturatio            | Annealing | Extension | Temp (°C) | Time (min) | Temp (°C) |                                                                                                |                                                                                                                                                                                                                                                                                                       | Time (min)                                                                                                                                       | Temp (°C) | Time (min) |
|                     |      |               |                                                              |                              | Sequence (5'→3')          | Lab Primer      | Lab Primer                    | Sequence (5'→3')          | Temp                   | Time      | Temp      |           |            |           |                                                                                                |                                                                                                                                                                                                                                                                                                       |                                                                                                                                                  |           |            |
| C2M18 <sup>a</sup>  | 2    | 206           | GB4, F32, U659, U815, 7G8, FCB, Cam3.II, RF7, HB3, Dd2       | A                            | CAAGTCGGTGTG<br>ATGATAT   | p7198           | p7734 (6-FAM)                 | TGTCGATTGGAT<br>AATGTTTG  | p7199                  | 98        | 0:20      | 54        | 0:15       | 65        | 0:15                                                                                           | CAAGTCGGTGTGATGATAT (AT) <sub>21</sub> AA<br>AAAT (ATA) <sub>2</sub> CAAGTC (AT) <sub>3</sub> A (AT) <sub>4</sub> A (AT) <sub>4</sub> (TATA) <sub>2</sub> TTATACAT (TA) <sub>5</sub><br>T (TA) <sub>3</sub> TTTATTTCAAACATTATCCCA<br>ATCGACA                                                          | 3'UTR of PF3D7_0204700<br>(hexose transporter)                                                                                                   |           |            |
| C3M67               | 3    | 804           | GB4, U815, 7G8, FCB, Cam3.II, RF12, RF7, HB3, Dd2            |                              | GTGTACCTCAAA<br>TTATTACC  | p7200           | p7800 (6-FAM)                 | TTTAAATGTTTA<br>TGGGAAC   | p7201                  | 98        | 0:20      | 54        | 0:15       | 65        | 0:15                                                                                           | GTGTACCTCAAAATTATTACCAATAC (TA) <sub>3</sub> TTACTATG (TA) <sub>20</sub> TGTAATAT<br>AG (TT) <sub>19</sub> TAAAGTCCCATAAACAT<br>TTCAAA                                                                                                                                                                | 3' UTR of PF3D7_0319200<br>( <i>ccr4-4</i> )                                                                                                     |           |            |
| C4M30 <sup>a</sup>  | 4    | 1082          | GB4, F32, U659, U815, 7G8, FCB, Cam3.II, RF7, HB3, Dd2       | B                            | ATTGATGCTTTG<br>TCTAATTAG | p7202           | p7735 (6-FAM)                 | ATGACAAAACAT<br>GGTATGTA  | p7203                  | 98        | 0:20      | 50        | 0:15       | 65        | 0:15                                                                                           | ATTGATGCTTTGTCTAATTAGAGTAT<br>ATG (AT) <sub>8</sub> (AAA) <sub>4</sub> AT (AA) <sub>3</sub> TA (AA<br>AT) <sub>2</sub> (AA) <sub>3</sub> T (AA) <sub>4</sub> T (AA) <sub>3</sub> T (AA) <sub>3</sub><br>TAAA (AT) <sub>23</sub> T (TTT) <sub>2</sub> (TA) <sub>3</sub> TTCAT<br>ATACATACCATGTTTGTTCAT | 3' UTR of PF3D7_0424000<br>( <i>Plasmodium</i> exported protein, unknown function) and 3'UTR of PF3D7_0424100 (reticulocyte binding homologue 5) |           |            |
| TAA81 / TA81        | 5    | 1214          | GB4, F32, U659, U815, 7G8, FCB, Cam3.II, RF12, RF7, HB3, Dd2 |                              | TTTCACACAACA<br>CAGGATT   | p7208           | p7801 (6-FAM)                 | TGGACAAATGGG<br>AAAGGATA  | p7209                  | 98        | 0:20      | 57        | 0:15       | 65        | 0:15                                                                                           | TTTCACACAACACAGGATTTATFACCA<br>TCACCATTAAATGTTATCATTCCTTG (TAT) <sub>30</sub> GTTTGATTGGTT (ATC) <sub>2</sub> T<br>TTATCCTTTCCCATTTGTCCA                                                                                                                                                              | Exon 1 of PF3D7_0529800<br>(conserved <i>Plasmodium</i> protein, unknown function)                                                               |           |            |
| TA1                 | 6    | 900           | GB4, F32, U659, U815, 7G8, FCB, Cam3.II, RF12, RF7, HB3, Dd2 |                              | TTTTATCTTCATC<br>CCCAC    | p7210           | p7802 (6-FAM)                 | CCGCATAAGTG<br>CAGAGC     | p7211                  | 98        | 0:20      | 54        | 0:15       | 65        | 0:15                                                                                           | TTTTATCTTCATCCCCACA (AAT) <sub>2</sub> (ATTATT) <sub>7</sub> ATT (ATC) <sub>4</sub> (ATTATT) <sub>3</sub><br>A (TCA) <sub>4</sub> TTA (TT) <sub>4</sub> (ATT) <sub>2</sub> A (TCA) <sub>2</sub> TTA (TT) <sub>4</sub> (ATT) <sub>3</sub> TTCTTTATA<br>TGCTCTGCACTTATGACGG                             | Exon of PF3D7_0622100<br>(conserved <i>Plasmodium</i> protein, unknown function)                                                                 |           |            |
| TA127 <sup>a</sup>  | 8    | 1160          | RF12, RF7, Dd2                                               | B                            | GCTTTATAAAAA<br>TAACACACC | p7222           | p7739 (6-FAM);<br>p7792 (VIC) | TAAAAAACACTC<br>AGTTTGAG  | p7223                  | 98        | 0:20      | 50        | 0:15       | 65        | 0:15                                                                                           | GCTTTATAAAAAATAACACACC (TA) <sub>4</sub><br>A (AT) <sub>14</sub> TATATACATTTCTATCTTT<br>A (TTCT) <sub>2</sub> TTTTA (TT) <sub>6</sub> ATCTCAAA<br>CTGAGTGTTTTTTA                                                                                                                                      | 3'UTR of PF3D7_0826700<br>(receptor for activated C kinase)                                                                                      |           |            |
| BM5 <sup>a</sup>    | 8    | 1224          | GB4, F32, U659, U815, 7G8, FCB, Cam3.II, RF12, RF7, Dd2      | A                            | GAAAGTAGATTG<br>TAGTATTTA | p7220           | p7738 (6-FAM);<br>p7791 (NED) | TACACATGAATG<br>ATTTAATCA | p7221                  | 98        | 0:20      | 50        | 0:15       | 65        | 0:15                                                                                           | GAAAGTAGATTGTAGTATTTAA (TT) <sub>3</sub><br>TATTA (AT) <sub>3</sub> GGATC (TAT) <sub>2</sub> TTTA<br>TTCAC (AT) <sub>17</sub> GTC (TA) <sub>4</sub> TTTTA (T<br>T) <sub>3</sub> CCTTTGTGATTAATCATTCATGT<br>GTA                                                                                        | Exon-3'UTR of<br>PF3D7_0828400<br>(mitochondrial inner membrane protein)                                                                         |           |            |
| C13M87 <sup>a</sup> | 13   | 1912          | GB4, U659, U815, FCB, Cam3.II, RF12, RF7, HB3, Dd2           | B                            | GATGAGAGAAG<br>GTAAAAATA  | p7236           | p7740 (6-FAM);<br>p7793 (NED) | CTTCAACACATC<br>TATGGATA  | p7237                  | 98        | 0:20      | 50        | 0:15       | 65        | 0:15                                                                                           | GATGAGAGAAGGTTAAAAT (ATA) <sub>2</sub> (AATA) <sub>7</sub> (TATATA) <sub>8</sub> T (TATG) <sub>2</sub> TGT<br>GC (AT) <sub>3</sub> TTATCCATAGATGTGTTGA<br>AG                                                                                                                                          | Exon5-Intron5-Exon6 of<br>PF3D7_1347800 (leucine-rich repeat protein)                                                                            |           |            |

<sup>a</sup>Indicate the 5 MS markers selected for genotyping laboratory strains.

<sup>b</sup>For the multiplex groups, VIC or NED primers were used for TA127, BM5, and C13M87.

<sup>c</sup>For all PCR reactions, the initial denaturation step is 95°C for 3 min, followed by the 30 cycles as indicated. These cycles are followed by a 65°C final extension step for 3 min. FAM, fluorescein amidite.

<sup>d</sup>MS repeat motifs were identified using the BioPHP Microsatellite Repeats Finder (1) with the following settings: length of repeated sequence = 2-6bp, min. # of repeats = 2, min. length of tandem repeat = 5, allowed % of mismatches = 0.

**TABLE S3** Sanger sequencing results of PCR using simulated fresh whole blood, frozen whole blood, and dried blood spot (DBS) gDNA

|                        | Parasitemia | <i>dhfr</i> <sup>a,b</sup> |      |       |       | <i>dhps</i> |       |       |       | <i>mdr1</i> |       | <i>pfcr</i> |      |      |      |      | <i>k13</i> |       |    |
|------------------------|-------------|----------------------------|------|-------|-------|-------------|-------|-------|-------|-------------|-------|-------------|------|------|------|------|------------|-------|----|
|                        |             | N51I                       | C59R | S108N | I164L | S436A       | A437G | K540E | A581G | N86Y        | Y184F | C72S        | M74I | N75E | K76T | H97Y | R539T      | C580Y |    |
| Simulated fresh blood  | NF54        | 2.00%                      | ✓    | ✓     | ✓     | ✓           | ✓     | ✓     | ✓     | ✓           | ✓     | ✓           | ✓    | ✓    | ✓    | ✓    | ✓          | ✓     | ✓  |
|                        |             | 0.40%                      | ✓    | ✓     | ✓     | ✓           | ✓     | ✓     | ✓     | ✓           | ✓     | nd          | nd   | nd   | nd   | nd   | ✓          | ✓     | ✓  |
|                        |             | 0.08%                      | nd   | nd    | nd    | nd          | ✓     | ✓     | ✓     | ✓           | nd    | ✓           | nd   | nd   | nd   | nd   | ✓          | ✓     | ✓  |
|                        |             | 0.02%                      | nd   | nd    | nd    | nd          | nd    | nd    | ✓     | nd          | nd    | nd          | nd   | nd   | nd   | nd   | nd         | nd    | nd |
|                        | Cam3.II     | 2.00%                      | ✓    | ✓     | ✓     | ✓           | ✓     | ✓     | ✓     | ✓           | ✓     | ✓           | ✓    | ✓    | ✓    | ✓    | ✓          | ✓     | ✓  |
|                        |             | 0.40%                      | nd   | nd    | nd    | nd          | ✓     | ✓     | ✓     | ✓           | ✓     | ✓           | ✓    | ✓    | ✓    | ✓    | ✓          | ✓     | ✓  |
|                        |             | 0.08%                      | nd   | nd    | nd    | nd          | ✓     | ✓     | ✓     | ✓           | ✓     | nd          | nd   | nd   | nd   | nd   | ✓          | ✓     | ✓  |
|                        |             | 0.02%                      | nd   | nd    | nd    | nd          | ✓     | ✓     | ✓     | ✓           | ✓     | nd          | nd   | nd   | nd   | nd   | nd         | nd    | nd |
| Simulated frozen blood | NF54        | 2.00%                      | ✓    | ✓     | ✓     | ✓           | ✓     | ✓     | ✓     | ✓           | ✓     | ✓           | ✓    | ✓    | ✓    | ✓    | ✓          | ✓     | ✓  |
|                        |             | 0.40%                      | ✓    | ✓     | ✓     | ✓           | ✓     | ✓     | ✓     | ✓           | ✓     | nd          | nd   | nd   | nd   | nd   | ✓          | ✓     | ✓  |
|                        |             | 0.08%                      | nd   | nd    | nd    | nd          | nd    | nd    | ✓     | ✓           | ✓     | nd          | nd   | nd   | nd   | nd   | nd         | nd    | nd |
|                        |             | 0.02%                      | nd   | nd    | nd    | nd          | nd    | nd    | nd    | nd          | ✓     | ✓           | nd   | nd   | nd   | nd   | nd         | nd    | nd |
|                        | Cam3.II     | 2.00%                      | ✓    | ✓     | ✓     | ✓           | ✓     | ✓     | ✓     | ✓           | ✓     | ✓           | ✓    | ✓    | ✓    | ✓    | ✓          | ✓     | ✓  |
|                        |             | 0.40%                      | ✓    | ✓     | ✓     | ✓           | ✓     | ✓     | ✓     | ✓           | ✓     | nd          | nd   | nd   | nd   | nd   | ✓          | ✓     | ✓  |
|                        |             | 0.08%                      | nd   | nd    | nd    | nd          | nd    | nd    | ✓     | ✓           | ✓     | nd          | nd   | nd   | nd   | nd   | nd         | nd    | nd |
|                        |             | 0.02%                      | nd   | nd    | nd    | nd          | nd    | nd    | nd    | nd          | ✓     | ✓           | nd   | nd   | nd   | nd   | ✓          | ✓     | ✓  |
| Simulated DBS gDNA     | NF54        | 2.00%                      | ✓    | ✓     | ✓     | ✓           | ✓     | ✓     | ✓     | ✓           | ✓     | ✓           | ✓    | ✓    | ✓    | ✓    | nd         | nd    | nd |
|                        |             | 0.40%                      | ✓    | ✓     | ✓     | ✓           | ✓     | ✓     | ✓     | ✓           | ✓     | ✓           | ✓    | ✓    | ✓    | ✓    | ✓          | ✓     | ✓  |
|                        |             | 0.08%                      | ✓    | ✓     | ✓     | ✓           | ✓     | ✓     | ✓     | ✓           | ✓     | ✓           | ✓    | ✓    | ✓    | ✓    | ✓          | ✓     | ✓  |
|                        |             | 0.02%                      | nd   | nd    | nd    | nd          | nd    | nd    | nd    | nd          | nd    | ✓           | nd   | nd   | nd   | ✓    | ✓          | ✓     | ✓  |
|                        | Cam3.II     | 2.00%                      | ✓    | ✓     | ✓     | ✓           | ✓     | ✓     | ✓     | ✓           | ✓     | ✓           | ✓    | ✓    | ✓    | ✓    | nd         | nd    | nd |
|                        |             | 0.40%                      | ✓    | ✓     | ✓     | ✓           | ✓     | ✓     | ✓     | ✓           | ✓     | ✓           | ✓    | ✓    | ✓    | ✓    | nd         | ✓     | ✓  |
|                        |             | 0.08%                      | ✓    | ✓     | ✓     | ✓           | ✓     | ✓     | ✓     | ✓           | ✓     | ✓           | ✓    | ✓    | ✓    | ✓    | nd         | ✓     | ✓  |
|                        |             | 0.02%                      | ✓    | ✓     | ✓     | ✓           | nd    | nd    | nd    | nd          | ✓     | ✓           | ✓    | ✓    | ✓    | ✓    | nd         | ✓     | ✓  |

<sup>a</sup>✓ = expected allele detected; nd = allele not detected.

<sup>b</sup>Gene IDs are *dhfr* (PF3D7\_0417200), *dhps* (PF3D7\_0810800), *pfmdr1* (PF3D7\_0523000), *pfcr* (PF3D7\_0709000), and *k13* (PF3D7\_1343700).



**TABLE S4** Single-nucleotide polymorphisms and microsatellite sizes of dried blood spots of Ugandan parasite samples and controls

| Samples <sup>d</sup> | Drug Resistance-Associated Gene and Change in Amino Acid <sup>a,b</sup> |      |       |       |             |       |       |       |       |                          |       |             |      |      |      |      |            |       |
|----------------------|-------------------------------------------------------------------------|------|-------|-------|-------------|-------|-------|-------|-------|--------------------------|-------|-------------|------|------|------|------|------------|-------|
|                      | <i>dhfr</i>                                                             |      |       |       | <i>dhps</i> |       |       |       |       | <i>mdr1</i> <sup>c</sup> |       | <i>pfcr</i> |      |      |      |      | <i>k13</i> |       |
|                      | N51I                                                                    | C59R | S108N | I164L | I431V       | S436A | A437G | K540E | A581G | N86Y                     | Y184F | C72S        | M74I | N75E | K76T | H97Y | R539T      | C580Y |
| NF54                 | WT                                                                      | WT   | WT    | WT    | WT          | WT    | WT    | WT    | WT    | WT                       | WT    | WT          | WT   | WT   | WT   | WT   | WT         | WT    |
| TO-04-01             | MUT                                                                     | MUT  | MUT   | WT    | nd          | nd    | nd    | MUT   | WT    | WT                       | WT    | WT          | WT   | WT   | WT   | WT   | WT         | WT    |
| TO-04-03             | MUT                                                                     | MUT  | MUT   | WT    | WT          | WT    | WT    | MUT   | WT    | WT                       | WT    | WT          | WT   | WT   | WT   | WT   | WT         | WT    |
| TO-04-04             | MUT                                                                     | MUT  | MUT   | WT    | WT          | WT    | WT    | MUT   | WT    | WT                       | MUT   | WT          | WT   | WT   | WT   | WT   | WT         | WT    |
| TO-04-05             | MUT                                                                     | MUT  | MUT   | WT    | WT          | WT    | WT    | MUT   | WT    | WT                       | MIX   | WT          | WT   | WT   | WT   | WT   | WT         | WT    |
| TO-04-06             | MUT                                                                     | MUT  | MUT   | MIX   | WT          | WT    | WT    | MUT   | nd    | nd                       | nd    | WT          | WT   | WT   | WT   | WT   | WT         | WT    |
| TO-04-07             | MUT                                                                     | MUT  | MUT   | WT    | WT          | WT    | WT    | MUT   | WT    | WT                       | MUT   | WT          | WT   | WT   | WT   | WT   | WT         | WT    |
| TO-04-08             | MUT                                                                     | MIX  | MUT   | WT    | WT          | WT    | WT    | MUT   | WT    | WT                       | WT    | WT          | WT   | WT   | WT   | WT   | WT         | WT    |
| TO-04-09             | MUT                                                                     | MUT  | MUT   | WT    | WT          | WT    | WT    | MUT   | nd    | nd                       | WT    | WT          | WT   | WT   | WT   | WT   | WT         | WT    |
| TO-04-11             | MUT                                                                     | MIX  | MUT   | WT    | WT          | WT    | WT    | MUT   | nd    | nd                       | nd    | WT          | WT   | WT   | WT   | WT   | WT         | WT    |
| TO-04-17             | MUT                                                                     | MUT  | MUT   | WT    | WT          | WT    | WT    | MUT   | WT    | WT                       | MIX   | WT          | WT   | WT   | WT   | WT   | WT         | WT    |
| TO-04-19             | MUT                                                                     | MUT  | MUT   | WT    | WT          | WT    | WT    | MUT   | WT    | WT                       | WT    | WT          | WT   | WT   | WT   | WT   | WT         | WT    |
| TO-04-20             | MUT                                                                     | MIX  | MUT   | WT    | WT          | WT    | WT    | MUT   | WT    | WT                       | MUT   | WT          | WT   | WT   | WT   | WT   | WT         | WT    |
| TO-04-21             | MUT                                                                     | WT   | MUT   | WT    | WT          | WT    | WT    | MUT   | WT    | WT                       | MUT   | WT          | WT   | WT   | WT   | WT   | WT         | WT    |
| TO-04-22             | MUT                                                                     | MUT  | MUT   | WT    | WT          | WT    | WT    | MUT   | WT    | WT                       | MUT   | WT          | MUT  | MUT  | MUT  | WT   | WT         | WT    |
| TO-04-23             | MUT                                                                     | MUT  | MUT   | WT    | WT          | WT    | WT    | MUT   | WT    | WT                       | MUT   | WT          | WT   | WT   | WT   | WT   | WT         | WT    |
| TO-04-24             | MUT                                                                     | MUT  | MUT   | WT    | WT          | WT    | WT    | MUT   | WT    | WT                       | WT    | WT          | WT   | WT   | WT   | WT   | WT         | WT    |
| U659                 | MUT                                                                     | MUT  | MUT   | WT    | WT          | WT    | WT    | MUT   | WT    | WT                       | MUT   | WT          | MUT  | MUT  | MUT  | WT   | WT         | WT    |

| Samples <sup>d</sup>  | Microsatellite Sizes Relative to NF54 (bp) |            |             |            |            |             |            |            |             |            |            |             |            |            |             |
|-----------------------|--------------------------------------------|------------|-------------|------------|------------|-------------|------------|------------|-------------|------------|------------|-------------|------------|------------|-------------|
|                       | BM5                                        |            |             | C13M87     |            |             | C2M18      |            |             | C4M30      |            |             | TA127      |            |             |
|                       | Major Peak                                 | % of Major | Minor Peaks | Major Peak | % of Major | Minor Peaks | Major Peak | % of Major | Minor Peaks | Major Peak | % of Major | Minor Peaks | Major Peak | % of Major | Minor Peaks |
| Absolute Size of NF54 | 143                                        |            |             | 141        |            |             | 159        |            |             | 187        |            |             | 125        |            |             |
| TO-04-01              | +27                                        | 62%        | +3, -14     | -28        | 100%       | --          | -17        | 100%       | --          | -24        | 100%       | --          | +4         | 100%       | --          |
| TO-04-03              | -6                                         | 100%       | --          | -24        | 100%       | --          | -24        | 100%       | --          | -28        | 100%       | --          | nd         | --         | --          |
| TO-04-04              | +7                                         | 71%        | -18         | nd         | --         | --          | -22        | 100%       | --          | -26        | 100%       | --          | +4         | 100%       | --          |
| TO-04-05              | +13                                        | 72%        | -12         | nd         | --         | --          | -13        | 100%       | --          | -28        | 100%       | --          | -6         | 100%       | --          |
| TO-04-06              | nd                                         | --         | --          | -22        | 100%       | --          | nd         | 100%       | --          | -28        | 100%       | --          | nd         | --         | --          |
| TO-04-07              | -4                                         | 100%       | --          | -24        | 100%       | --          | nd         | 100%       | --          | -28        | 100%       | --          | nd         | --         | --          |
| TO-04-08              | +5                                         | 100%       | --          | -5         | 100%       | --          | -19        | 100%       | --          | -28        | 100%       | --          | 0          | 100%       | --          |
| TO-04-09              | -4                                         | 100%       | --          | nd         | --         | --          | nd         | 100%       | --          | -28        | 100%       | --          | nd         | --         | --          |
| TO-04-11              | nd                                         | --         | --          | nd         | --         | --          | -20        | 100%       | --          | -28        | 100%       | --          | nd         | --         | --          |
| TO-04-17              | +17                                        | 67%        | -8          | -22        | 100%       | --          | -22        | 100%       | --          | +12        | 71%        | -28         | 0          | 100%       | --          |
| TO-04-19              | -2                                         | 57%        | -8          | -26        | 100%       | --          | -24        | 100%       | --          | -28        | 100%       | --          | 0          | 100%       | --          |
| TO-04-20              | +15                                        | 74%        | -10         | -15        | 72%        | -2          | -28        | 100%       | --          | -28        | 100%       | --          | 0          | 100%       | --          |
| TO-04-21              | +15                                        | 77%        | -10         | -15        | 100%       | --          | -24        | 100%       | --          | -26        | 100%       | --          | 0          | 100%       | --          |
| TO-04-22              | -16                                        | 100%       | --          | -17        | 100%       | --          | -22        | 100%       | --          | -17        | 100%       | --          | -4         | 100%       | --          |
| TO-04-23              | +9                                         | 58%        | -16         | -10        | 100%       | --          | -10        | 86%        | -1          | -28        | 100%       | --          | nd         | --         | --          |
| TO-04-24              | +19                                        | 62%        | -4          | -26        | 100%       | --          | -24        | 100%       | --          | -11        | 100%       | --          | +4         | 100%       | --          |
| U659                  | -14                                        | 100%       | --          | -22        | 100%       | --          | -17        | 100%       | --          | -14        | 100%       | --          | +2         | 100%       | --          |

<sup>a</sup>Gene IDs are *dhfr* (PF3D7\_0417200), *dhps* (PF3D7\_0810800), *pfmdr1* (PF3D7\_0523000), *pfcr* (PF3D7\_0709000), and *k13* (PF3D7\_1343700).

<sup>b</sup>WT = wild-type; MUT = mutant; MIX = both wild-type and mutant peaks detected; ND = not detected.

<sup>c</sup>PCR primers p7820 and p7821, and sequencing primer p7820 worked better for detecting *pfmdr1* alleles than p792 and p286 in DBS samples.

<sup>d</sup>NF54 and U659 samples used gDNA purified from cultures. All other samples were gDNA extracted from dried blood spots collected from 16 Ugandan patients harboring symptomatic *P. falciparum* infections.

**TABLE S5** KEL1/PLA1/PfPailin (KelPP) co-lineage status assayed in ten *P. falciparum* strains

| Parasite Name               | Provider     | Origin              | Year | K13 <sup>a</sup> | PfCRT <sup>a,b</sup> | <i>k13</i> -flanking Microsatellite Size Relative to 3D7 |         |         |         |        |         | Plasmepsin 2 <sup>a</sup> Copy No. |
|-----------------------------|--------------|---------------------|------|------------------|----------------------|----------------------------------------------------------|---------|---------|---------|--------|---------|------------------------------------|
|                             |              |                     |      |                  |                      | -50kb                                                    | -31.9kb | -6.36kb | -0.15kb | +8.6kb | +31.5kb |                                    |
| NF54/3D7                    | --           | Africa              | 1979 | WT               | WT                   | 0                                                        | 0       | 0       | 0       | 0      | 0       | 1                                  |
| U659                        | P. Rosenthal | Uganda              | 2007 | WT               | GB4                  | -9                                                       | -4      | -6      | -18     | 14     | 3       | 1                                  |
| S170 Clone 1H1              | L. Musset    | French Guiana       | 2018 | WT               | 7G8+C350R            | -4                                                       | -2      | -3      | -30     | -14    | -3      | ≥2 (PLA1)                          |
| Dd2                         | T. Welles    | Cambodia            | 1980 | WT               | Dd2                  | -6                                                       | -6      | 0       | -30     | 4      | -3      | 1                                  |
| Cam2 (IPC 3445)             | D. Ménard    | Pailin, W. Cambodia | 2010 | C580Y (KEL1)     | Dd2                  | -6                                                       | -6      | 0       | -30     | 12     | -3      | 1                                  |
| PH0482-C Clone E11          | R. Fairhurst | Pursat, W. Cambodia | 2010 | C580Y (KEL1)     | Dd2                  | -6                                                       | -6      | 0       | -30     | 16     | -3      | 1                                  |
| PH0212-C Clone C11          | R. Fairhurst | Pursat, W. Cambodia | 2010 | C580Y (KEL1)     | Dd2                  | -6                                                       | -6      | 0       | -30     | 16     | -3      | 1                                  |
| KH001-061                   | S. Volkman   | Pursat, W. Cambodia | 2011 | C580Y (KEL1)     | Dd2                  | -6                                                       | -6      | 0       | -30     | 17     | -3      | 1                                  |
| RF7 (PH1008-C) <sup>c</sup> | R. Fairhurst | Pursat, W. Cambodia | 2012 | C580Y (KEL1)     | Dd2+M343L            | -6                                                       | -6      | 0       | -30     | 16     | -3      | ≥2 (PLA1)                          |
| Cam3.II (RF967 / PH0306-C)  | R. Fairhurst | Pursat, W. Cambodia | 2010 | R539T (KEL3)     | Dd2                  | -6                                                       | -6      | 0       | -30     | -10    | 6       | 1                                  |

<sup>a</sup>Gene IDs are *k13* (PF3D7\_1343700), *pfprt* (PF3D7\_0709000), and *plasmepsin 2* (PF3D7\_1408000).

<sup>b</sup>The *pfprt* haplotype for Dd2: M74I N75E K76T A220S Q271E N326S I356T R371I; GB4: M74I N75E K76T A220S Q271E R371I; 7G8: C72S K76T A220S N326D I356L.

<sup>c</sup>RF7 is the only KEL1/PLA1/PfPailin haplotype identified herein.

## SUPPLEMENTAL METHODS

### Parasite culture PCR protocol for SNP genotyping

#### Required reagents:

- ddH<sub>2</sub>O
- Bioline 2× MyTaq Blood-PCR Mix (Cat. No. BIO-25054)
- Forward, Reverse, and Sequencing Primers (diluted to 5 μM)
- 3 μL of ≥ 1% parasitemia *P. falciparum*-infected packed RBCs (pRBCs)
- PCR tubes
- PCR thermal cycler
- Centrifuge
- PCR purification kit
- Sanger sequencer and sequence analyzer software

#### Method:

1. Prepare the PCR reaction master mix as follows, referencing the primer combination listed in **Table S1**:

| Reagent                | Per Reaction (μL) |
|------------------------|-------------------|
| ddH <sub>2</sub> O     | 15                |
| 2× MyTaq Blood-PCR Mix | 20                |
| Fwd Primer (5 μM each) | 1                 |
| Rev Primer (5 μM each) | 1                 |

- a. Add 37 μL of the reaction master mix to a reaction tube.
  - b. Add 3 μL of *P. falciparum*-infected pRBCs and mix with a pipette.
  - c. Briefly centrifuge reaction mixture for 2-3 seconds.
2. Run the PCR reaction according to the conditions outlined in **Table S1**.
  3. Spin the PCR reaction for 1 min at 8000g.
  4. Making sure to avoid the blood pellet, transfer 30 μL of the supernatant to a new PCR tube.  
(*Can pause here and leave samples in a 4°C fridge overnight*).
  5. Run 7 μL of the supernatant on a 0.8% gel for 40 min at 120V.
  6. PCR-purify 20 μL of the supernatant and send the PCR product for Sanger sequencing with the appropriate sequencing primer.
  7. Identify the amino acid codon at the desired position using a sequence analyzer software.

## Gel electrophoresis- and fragment analysis-based protocol for microsatellite genotyping

### Required reagents:

- Roche KAPA HiFi HotStart Ready Mix (2×) (Cat. No. KK2601)
- ddH<sub>2</sub>O
- Forward, Reverse, and Sequencing Primers (diluted to 10 μM)
  - \*For PCR reactions for fragment analysis, the Fwd or Rev primer must be fluorescently labeled.
- PCR tubes or 96-well plate
- PCR thermal cycler
- Centrifuge
- Gel electrophoresis:
  - Agarose
  - TBE Buffer
  - Invitrogen™ Ultra Low Range Ladder (Cat. No. 10597012) (includes 6× TrackIt Cyan/Yellow Loading Buffer)
  - Electrophoresis tank and power supply
  - Gel imager
- Fragment analysis:
  - Applied Biosystems™ ExoSAP-IT™ Express PCR Product Cleanup Reagent (Cat. No. 75001.1.ML)
  - DNA sizing software (e.g. Thermo Fisher Scientific Peak Scanner)
- Reference parasite strains (e.g. 3D7, genetic cross parents) with known marker sizes should be included as internal controls on the gel and in each fragment analysis run, respectively.

### Method:

1. Prepare the PCR reaction master mix as follows, referencing the primer combination listed in **Table S2**:

| Reagent                           | Per Reaction (μL) |
|-----------------------------------|-------------------|
| ddH <sub>2</sub> O                | 3.6               |
| KAPA HiFi HotStart Ready Mix (2×) | 7.5               |
| Fwd Primer (10μM)                 | 0.45              |
| Rev Primer (10μM)                 | 0.45              |

- a. Add 12 μL of the master mix to a PCR tube or well.
  - b. Add 3 μL of gDNA template (4 ng/μL).
  - c. Seal the tube or plate, and mix by vortexing for 2-3 seconds.
  - d. Briefly spin reaction mixture by centrifugation for 2-3 sec (tube) or 1000rpm x 1 min (plate).
2. Run PCR according to the conditions outlined in **Table S2**.  
(Can pause after PCR and store samples at -20°C).

### Gel Electrophoresis:

3. Run 5 µL of PCR product on a 2% agarose gel at 100V for 1.5-2 h, ensuring that all strains for each marker fit into a single comb within one gel.
4. Run 6 µL of the 1× Ultra Low Range Ladder on both ends of the gel for band size identification.
5. Visualize the PCR products with a gel imager.
6. Identify the microsatellite size for each strain using the reference strain as a comparator.
  - a. Note: if more than one band is observed for the sample, this may indicate a polyclonal sample.

### Fragment Analysis (FA):

1. If multiplexing, mix PCR products according to the following ratios:

| Marker | Group for Multiplexing | Label                | Mixing Ratio Post-PCR |
|--------|------------------------|----------------------|-----------------------|
| C2M18  | A                      | 6-FAM (Blue)         | 2                     |
| BM5    |                        | NED/ATTO550 (Yellow) | 1                     |
| C4M30  | B                      | 6-FAM (Blue)         | 1                     |
| TA127  |                        | VIC/ATTO532 (Green)  | 1                     |
| C13M87 |                        | NED/ATTO550 (Yellow) | 1                     |

2. Clean up PCR product by adding 2 µL of ExoSAP-IT™ *Express* PCR Product Cleanup Reagent to 5 µL of PCR product in a new tube or well.
3. Vortex for 2-3 seconds to ensure mixing.
4. Spin down for 2-3 sec (tube) or 1000rpm × 1 min (plate).
5. Incubate at 37°C for 4 min and 80°C for 1 min to inactivate the enzyme in a thermocycler.
6. Dilute sample 10× by adding 2 µL of cleaned-up product with 18 µL of ddH<sub>2</sub>O.
7. Send 20 µL of reaction for FA using the Liz500 ladder.
8. Analyze microsatellite size using a DNA sizing software.
  - a. Restrict sizes to 100-300 bp, peak threshold to 500 for desired color (e.g. blue for FAM) and 50 for others not in use (e.g. red).
  - b. Export data as an Excel file, and sort by sample name (and color if multiplexing), and then by peak area.
  - c. The size of the peak with the largest area indicates the dominant MS size.
  - d. Obtain absolute and relative MS sizes (compared to reference strain such as NF54).
  - e. Note: If analyzing genetic cross progeny, use the MS sizes in the parental samples as a reference for the progeny. The MS sizes in the progeny should match the MS size in either parent.
  - f. If detecting potential contamination by another strain
    - i. If  $(\text{minor peak area} / (\text{major} + \text{minor peak area}) * 100\% > 10\%)$  at the same marker for the same sample, flag as a mixture. However, if <10% mix seen in multiple markers for a sample, repeat PCR+FA to verify clonal purity.

## ***Plasmepsin 2 (pm2)* copy number quantification by multiplexed TaqMan qPCR protocol**

### Required reagents:

- NanoDrop or Qubit
- Ice
- ddH<sub>2</sub>O
- Bio-Rad SsoAdvanced Universal Probes Supermix (2×) (Cat. No. 1725282)
- Dual-Labeled TaqMan Probes (DLPs; diluted to 10 μM)
  - *pm2*: 5'-6-FAM-CAACATTTGATGGTATCCTTGGTTTAGGATGGA-MGB-Eclipse-3'
  - *β-tubulin*: 5'-HEX-TAGCACATGCCGTTAAATATCTTCCATGTCT-BHQ1-3'
- Primers (diluted to 10 μM)
  - *pm2* Fwd: GGATTCGAACCAACTTATACTGC
  - *pm2* Rev: AATTGGATCTACTGAACCTATTGATAA
  - *β-tubulin* Fwd: TGATGTGCGCAAGTGATCC
  - *β-tubulin* Rev: TCCTTTGTGGACATTCTTCCTC
- Gene fragment standards of *pm2: β-tubulin* mixed at 1:1, 2:1, 3:1, 4:1, and 5:1 molar ratios as described in (2).
- Applied Biosystems MicroAmp EnduraPlate Optical 96-well Fast Clear Reaction Plate with Barcode (Cat. No. 4483485)
- Applied Biosystems Optical Adhesive Covers (Cat. No. 4360954)
- Centrifuge
- Real-Time PCR System

### Method:

1. Use a NanoDrop or Qubit to quantify template DNA on the same day as the qPCR run, and adjust to 4 ng/μL if necessary.
2. Thaw Sso 2× mix, probes, primers, and standards on ice and protected from light for 20 minutes.
3. Prepare the PCR reaction master mix as follows:

| <b>Reagent</b>                                  | <b>Volume (μL)<br/>per reaction</b> | <b>Final<br/>Concentration</b> |
|-------------------------------------------------|-------------------------------------|--------------------------------|
| ddH <sub>2</sub> O                              | 5.02                                |                                |
| Sso mix (2×)                                    | 10                                  | 1×                             |
| <i>pm2</i> Fwd+Rev Primer Mix (10μM each)       | 0.66                                | 0.33 μM                        |
| <i>pm2</i> TaqMan probe                         | 0.33                                | 0.16 μM                        |
| <i>β-tubulin</i> Fwd+Rev Primer Mix (10μM each) | 0.66                                | 0.33 μM                        |
| <i>β-tubulin</i> TaqMan probe                   | 0.33                                | 0.16 μM                        |

- a. Get a clear qPCR plate and label sections according to each sample.
- b. Add 17 μL of the reaction master mix to each tube or well.
- c. Add 3 μL of template DNA (4 ng/μL) or ddH<sub>2</sub>O (no template control, NTC) in triplicate for each sample and mix well by pipetting.
- d. Include as a *pm2* copy 1 control: 3D7 or NF54
- e. Include as *pm2* copy 1-5 controls: gene fragment standards of *pm2: β-tubulin* mixed at 1:1, 2:1, 3:1, 4:1, and 5:1 molar ratios.

4. Seal the plate using a plate seal applicator.
5. Spin down for 1000rpm × 1 min.
6. Run the qPCR program in a Real-Time PCR system as follows:

| Cycles | Step                                  | Temperature | Duration |
|--------|---------------------------------------|-------------|----------|
| 1      | Denaturation                          | 95°C        | 3 min    |
| 40     | Denaturation                          | 95°C        | 20 s     |
|        | Annealing,<br>Extension,<br>Detection | 58°C        | 40 s     |

7. Quantify copy number by using the standard curve method for relative quantification:

$$ratio = \frac{(1.8293)^{\Delta Ct_{(pfpm2)}}}{(1.8531)^{\Delta Ct_{(pf\beta-tubulin)}}$$

$$\Delta Ct(pm2) = avg. Ct(pm2 in 3D7 reference) - avg. Ct(pm2 in sample)$$

$$\Delta Ct(\beta - tubulin) = avg. Ct(\beta - tubulin in 3D7 reference) - avg. Ct(\beta - tubulin in sample)$$

- a. 1.8293 and 1.8531 are the primer efficiencies for *pm2* and *β-tubulin*, respectively. Primer efficiencies were determined using qPCR analysis of serially-diluted gDNA as detailed in (3).

## SUPPLEMENTAL REFERENCES

1. Bikandi J. 2006. BioPHP - Microsatellite Repeats Finder (version 2). [http://insilico.ehu.es/mini\\_tools/microsatellites/](http://insilico.ehu.es/mini_tools/microsatellites/). Retrieved 12 April 2021. {Code and/or software.}
2. Witkowski B, Duru V, Khim N, Ross LS, Saintpierre B, Beghain J, Chy S, Kim S, Ke S, Kloeung N, Eam R, Khean C, Ken M, Loch K, Bouillon A, Domergue A, Ma L, Bouchier C, Leang R, Huy R, Nuel G, Barale JC, Legrand E, Ringwald P, Fidock DA, Mercereau-Puijalon O, Ariey F, Menard D. 2017. A surrogate marker of piperazine-resistant *Plasmodium falciparum* malaria: a phenotype-genotype association study. *Lancet Infect Dis* 17:174-183.
3. Ross LS, Dhingra SK, Mok S, Yeo T, Wicht KJ, Kumpornsin K, Takala-Harrison S, Witkowski B, Fairhurst RM, Ariey F, Menard D, Fidock DA. 2018. Emerging Southeast Asian PfCRT mutations confer *Plasmodium falciparum* resistance to the first-line antimalarial piperazine. *Nat Commun* 9:3314.
